# Supplementary material
Source: publisher site journal article supplement (https://www.dovepress.com/article/563670)
Supplement: Supplementary file 1 [file 563670_Supplementary%20Material_1.docx]

| A  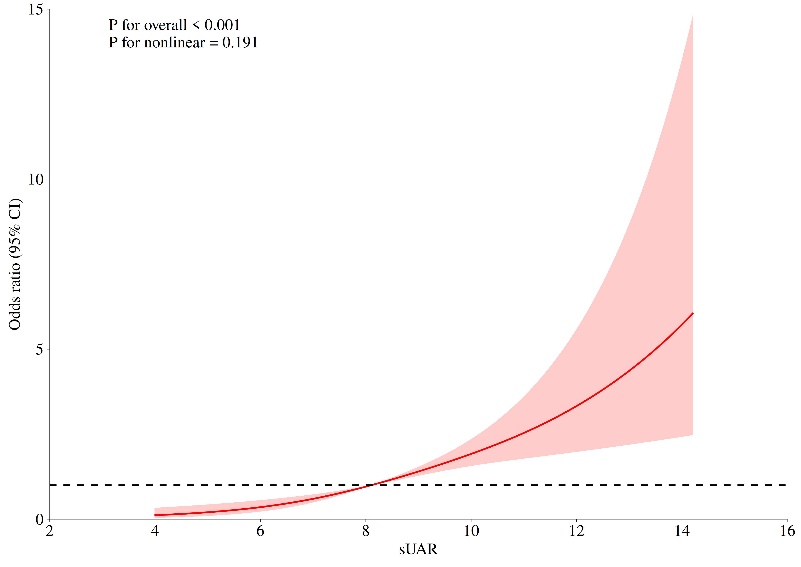 |
| --- |
| B  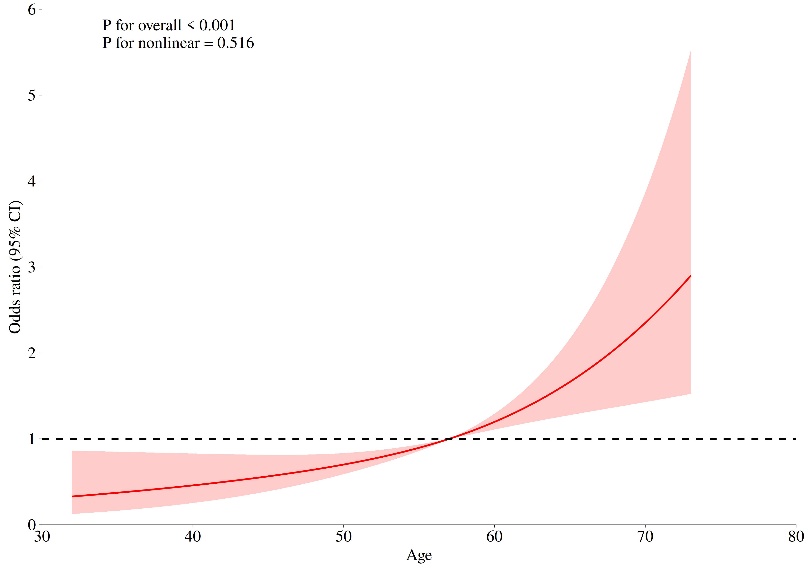 |
| C  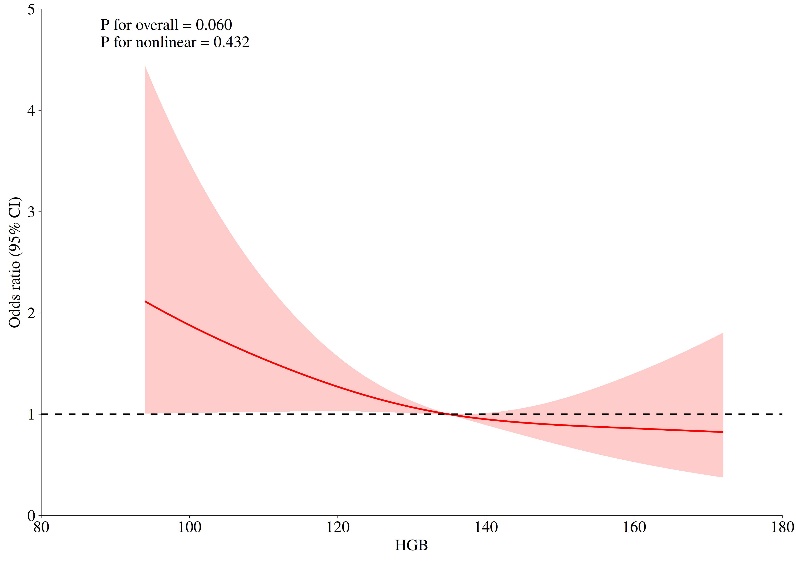 |
| **Figure S1** Restricted Cubic Spline (RCS). **(A)** The relationship between sUAR and AKI risk. **(B)** The relationship between Age and AKI risk. **(C)** The relationship between HGB and AKI risk. |

| 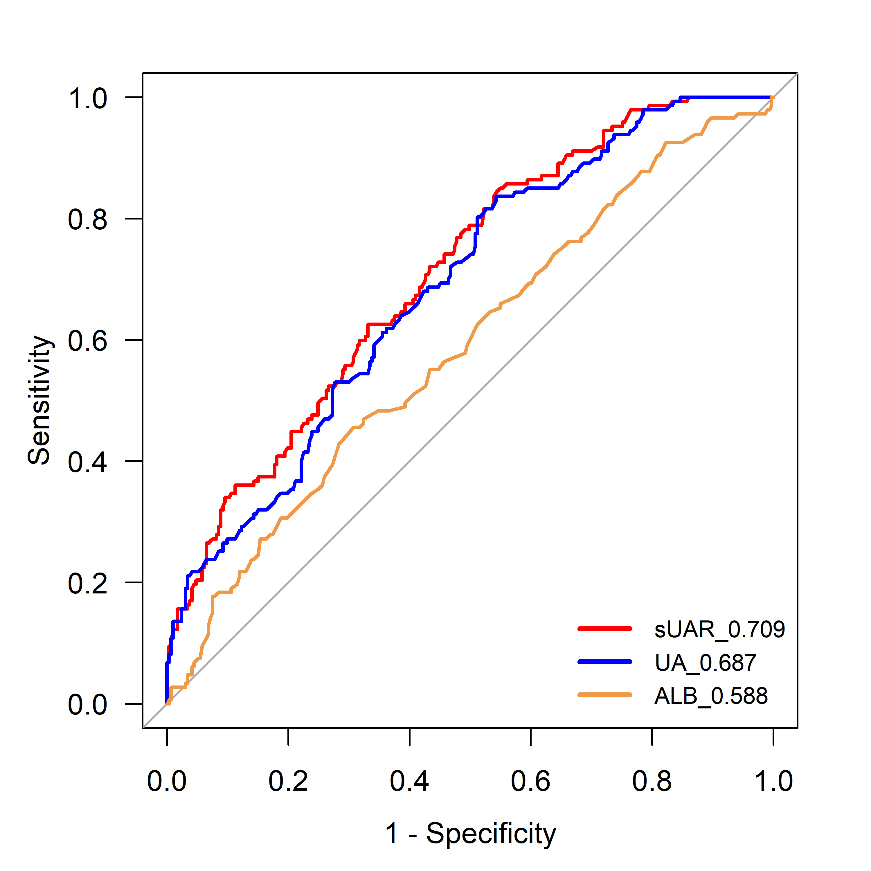 |
| --- |
| **Figure S2** The ROC curve of UA, ALB, and sUAR.  **Abbreviations:** sUAR, serum uric acid-to-albumin ratio. |

| 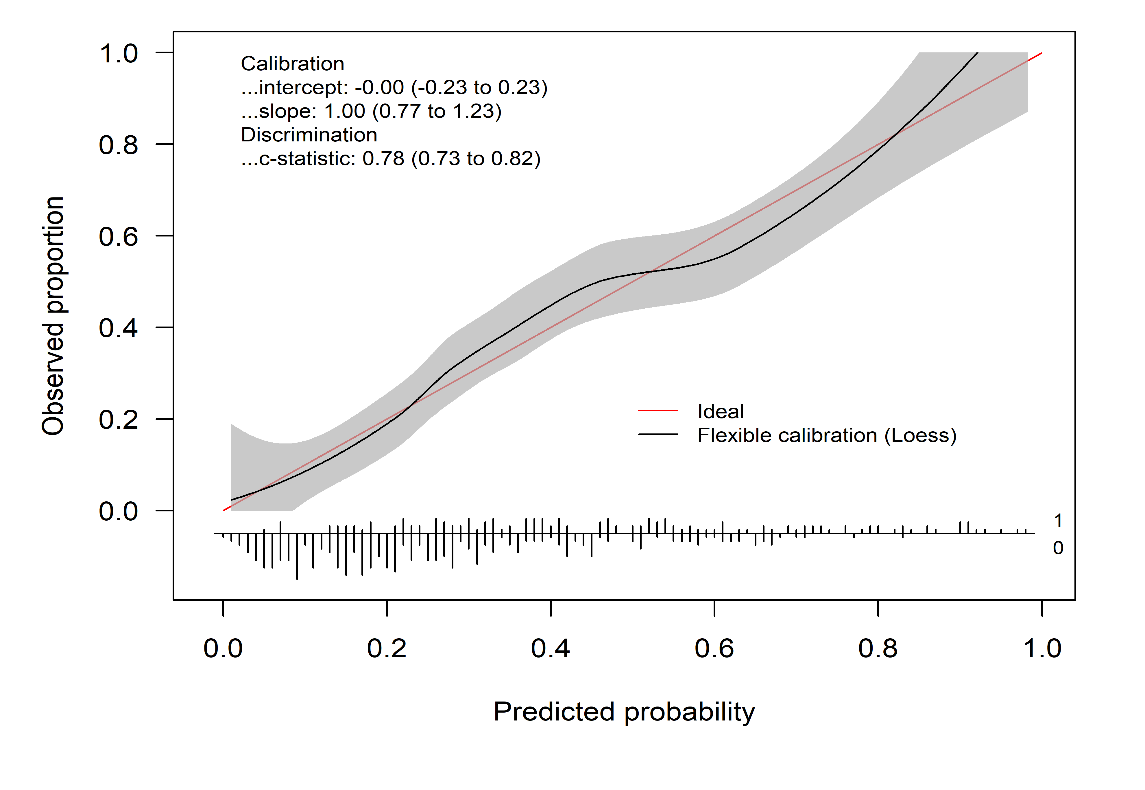 |
| --- |
| **Notes:** Shaded areas represent the 95% CIs (Bootstrop, n=1000)  **Figure S3** Calibration plot with loess of the nomogram prediction model for AKI. |

|  | |
| --- | --- |
|  |  |
|  | |

**Table S1** Collinearity Analysis

| Variables | Tolerance | VIF |
| --- | --- | --- |
| Age (years) | 0.410 | 2.438 |
| AF | 0.829 | 1.207 |
| lnNT-proBNP (pg/mL) | 0.720 | 1.390 |
| HGB (g/L) | 0.714 | 1.401 |
| Urea (mmol/L) | 0.745 | 1.342 |
| SCr (μmol/L) | 0.283 | 3.535 |
| eGFR [ml·min-1· (1.73m2)-1] | 0.234 | 4.280 |
| UA (μmol/L) | 0.008 | 132.083 |
| Blood glucose (mmol/L) | 0.925 | 1.081 |
| ALB (g/L) | 0.077 | 13.059 |
| sUAR (μmol/g) | 0.007 | 140.520 |

**Notes:** Collinearity analysis of the 11 indicators included after univariate logistic regression analysis.

**Abbreviations:** AF, Atrial fibrillation; NT-proBNP, N-terminal pro-B-type natriuretic peptide; LY, lymphocyte; HGB, hemoglobin; SCr, serum creatinine; eGFR, estimated glomerular filtration rate; UA, uric acid; ALB, albumin; sUAR, serum uric acid-to-albumin ratio; VIF, variance inflation factor.

**Table S2** Comparison of UA, ALB, and sUAR

| Variables | AUC | 95%*CI* | *P* value | Sn | Sp |
| --- | --- | --- | --- | --- | --- |
| UA (μmol/L) | 0.687 | 0.636-0.737 | <0.001 | 83.67% | 45.73% |
| ALB (g/L) | 0.588 | 0.532-0.644 | 0.001 | 45.58% | 69.28% |
| sUAR (μmol/g) | 0.709 | 0.660-0.759 | <0.001 | 84.35% | 45.73% |

**Notes:** Delong test: sUAR vs. UA (*P*=0.011); sUAR vs. ALB (*P*<0.001).

**Abbreviations:** AUC, area under the ROC curve; UA, uric acid; ALB, albumin; sUAR, serum uric acid-to-albumin ratio; ROC, receiver operating characteristic; Sn, sensitivity; Sp, specificity.
